- in chronic pain clinical trials: IMMPACT recommendations. *J Pain* 2008; 9:105–21
28. Martinez V, Szekely B, Lemarié J, Martin F, Gentili M, Ben Ammar S, Lepeintre JF, Garreau de Loubresse C, Chauvin M, Bouhassira D, Fletcher D: The efficacy of a glial inhibitor, minocycline, for preventing persistent pain after lumbar discectomy: A randomized, double-blind, controlled study. *Pain* 2013; 154:1197–203
  29. Sumracki NM, Hutchinson MR, Gentgall M, Briggs N, Williams DB, Rolan P: The effects of pregabalin and the glial attenuator minocycline on the response to intradermal capsaicin in patients with unilateral sciatica. *PLoS One* 2012; 7:e38525
  30. Cohen SP, Hurley RW, Christo PJ, Winkley J, Mohiuddin MM, Stojanovic MP: Clinical predictors of success and failure for lumbar facet radiofrequency denervation. *Clin J Pain* 2007; 23:45–52
  31. Nakano S, Hollister LE: Chronopharmacology of amitriptyline. *Clin Pharmacol Ther* 1983; 33:453–9
  32. Gilron I, Bailey JM, Tu D, Holden RR, Jackson AC, Houlden RL: Nortriptyline and gabapentin, alone and in combination for neuropathic pain: A double-blind, randomised controlled crossover trial. *Lancet* 2009; 374:1252–61
  33. Chaparro LE, Wiffen PJ, Moore RA, Gilron I: Combination pharmacotherapy for the treatment of neuropathic pain in adults. *Cochrane Database Syst Rev* 2012; 7:CD008943
  34. Iwamoto K, Kawamura Y, Takahashi M, Uchiyama Y, Ebe K, Yoshida K, Iidaka T, Noda Y, Ozaki N: Plasma amitriptyline level after acute administration, and driving performance in healthy volunteers. *Psychiatry Clin Neurosci* 2008; 62:610–6
  35. Garner SE, Eady A, Bennett C, Newton JN, Thomas K, Popescu CM: Minocycline for acne vulgaris: Efficacy and safety. *Cochrane Database Syst Rev* 2012; 8:CD002086

## ANESTHESIOLOGY REFLECTIONS FROM THE WOOD LIBRARY-MUSEUM

### A Floridian Salute to a Clevelander: Liberty Ship SS *Harvey Cushing*

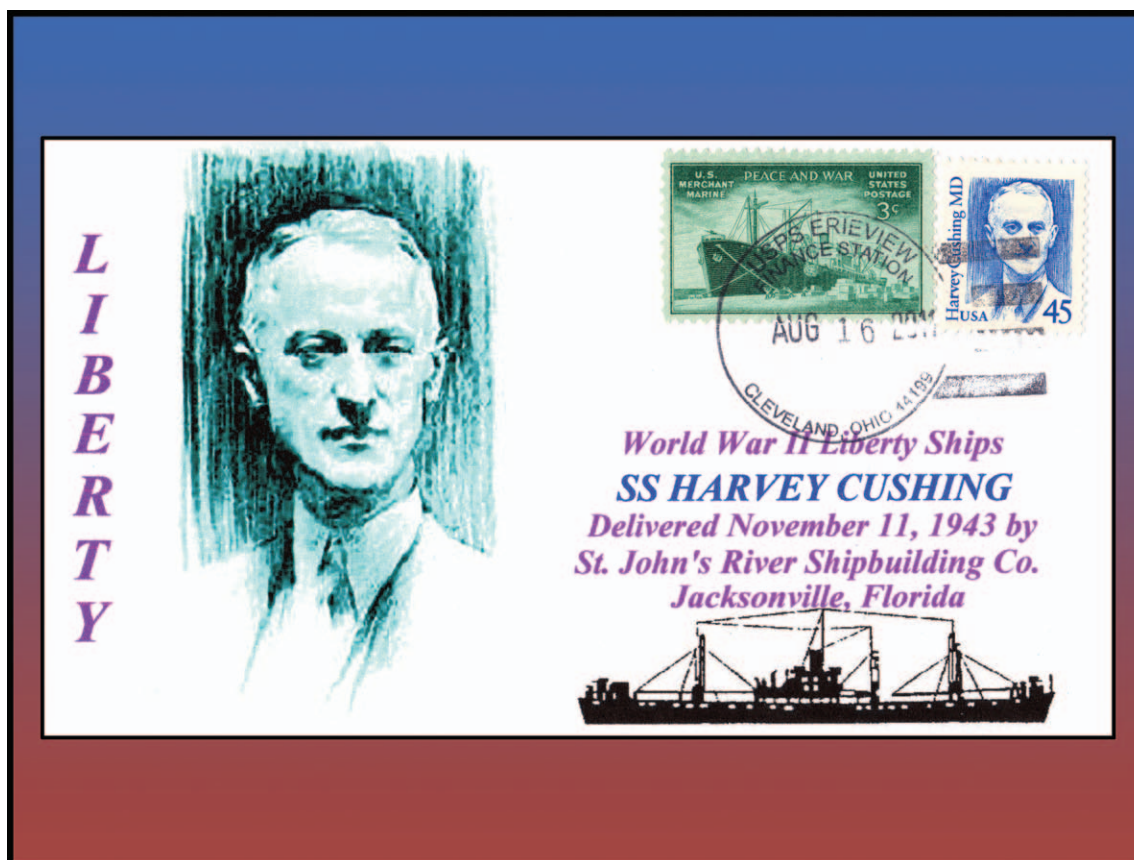

This postal cover (above) commemorates the 1943 delivery of the "Liberty Ship" SS *Harvey Cushing* and the celebrity of its namesake surgeon and anesthesia pioneer (Harvey Williams Cushing, M.D., "Father of Modern Neurosurgery"; Johns Hopkins, Harvard, and Yale Universities, USA) (1869–1939). Anesthesiologists salute Dr. Cushing for popularizing the use of anesthetic records and of intraoperative monitoring of patients' blood pressures and vital sounds (breathing and heart beat). This cover was postally cancelled in the city where Dr. Cushing was born and where he was buried—Cleveland, Ohio. (Copyright © the American Society of Anesthesiologists, Inc.)

George S. Bause, M.D., M.P.H., Honorary Curator, ASA's Wood Library-Museum of Anesthesiology, Schaumburg, Illinois, and Clinical Associate Professor, Case Western Reserve University, Cleveland, Ohio. UJYC@aol.com.
